# Supplementary material for: Structural insights into the ligand binding and Gi coupling of serotonin receptor 5-HT5A
Source: PubMed Central journal article supplement (PMC9130316; doi:10.1038/s41421-022-00412-3), 2022-05-24
Supplement: 41421_2022_412_MOESM1_ESM.pdf [file 41421_2022_412_MOESM1_ESM.pdf]

1 **Supplementary Information**

2

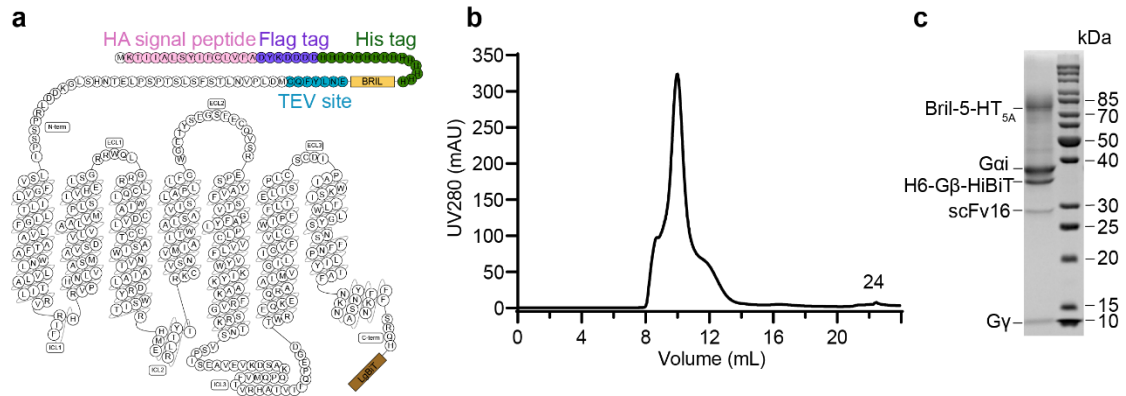

3

4 **Fig. S1 Characterization and purification of the 5-CT-5-HT<sub>5A</sub>-G<sub>i</sub> complex.** **a** Schematic  
5 illustration of the HA-Flag-His15-BRIL-5-HT<sub>5A</sub>-TEV site-LgBiT construct used in the study.  
6 The HA signal peptide (pink), Flag (purple), His15 (green), BRIL (yellow), TEV (blue) and  
7 LgBiT (brown) are indicated. **b** Analytical size-exclusion chromatography of the purified  
8 complex on Superdex 200 Increase 10/300 column. **c** SDS-PAGE analysis of the purified  
9 complex with Coomassie blue staining.

10

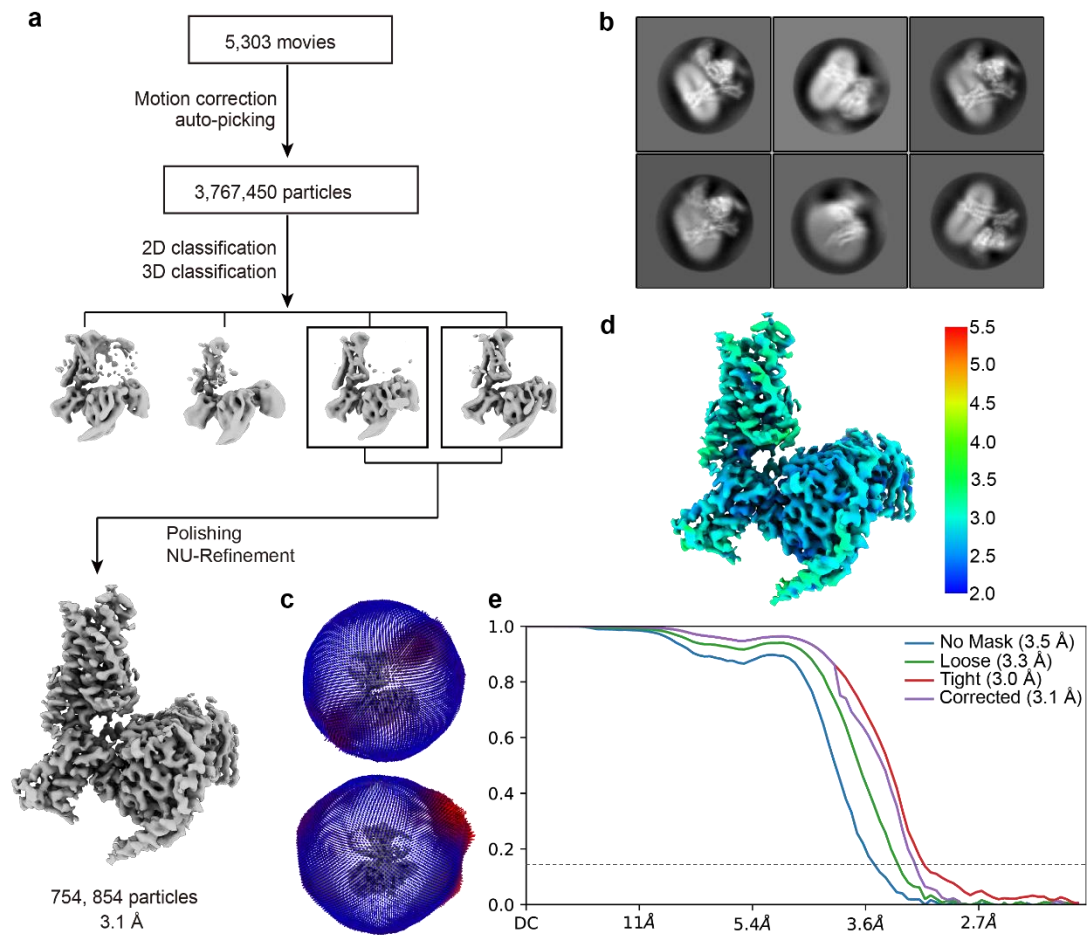

11

12 **Fig. S2 The cryo-EM data processing and density map of the 5-CT-5-HT<sub>5A</sub>-G<sub>i</sub> complex.**

13 **a** Flow chart of cryo-EM data processing. **b** Representative cryo-EM micrograph from 5,303

14 movies and representative two-dimensional class averages determined using approximately 3.8

15 million particles of the 5-CT-5-HT<sub>5A</sub>-G<sub>i</sub> complex were shown. **c** Angle distribution maps. **d**

16 Cryo-EM map of the 5-CT-5-HT<sub>5A</sub>-G<sub>i</sub> complex, colored by local resolution (Å) calculated

17 using Resmap package. **e** 'Gold-standard' Fourier shell correlation curves of the 5-CT-5-

18 HT<sub>5A</sub>-G<sub>i</sub> complex.

19

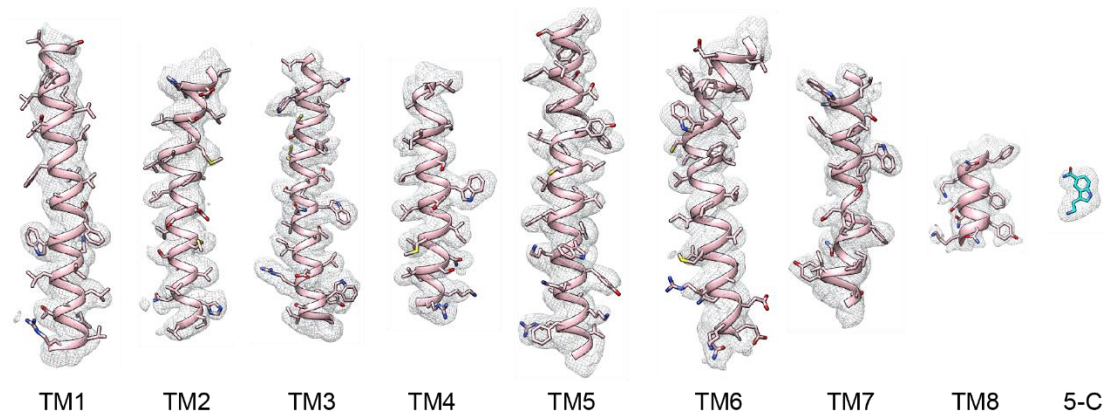

20

TM1

TM2

TM3

TM4

TM5

TM6

TM7

TM8

5-CT

21

**Fig. S3 Representative cryo-EM density map of the 5-CT-5-HT<sub>5A</sub>-G<sub>i</sub> complex. Cryo-EM**

22

density of transmembrane helices, helix 8 and 5-CT.

23

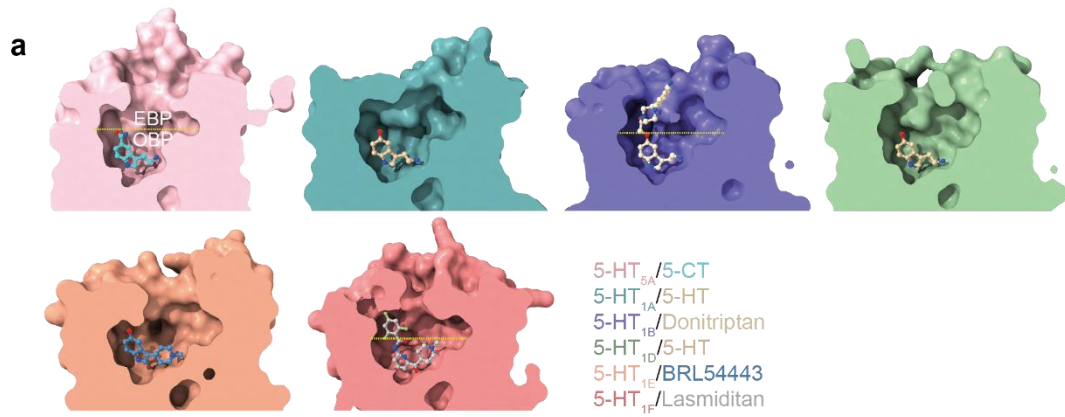

**b**

|                                 | TM3                      | TM4       | TM5                      | TM6                                | TM7                      | ECL2        |
|---------------------------------|--------------------------|-----------|--------------------------|------------------------------------|--------------------------|-------------|
|                                 | 3:28 3:29 3:33 3:36 3:37 | 4:56 4:60 | 5:38 5:39 5:42 5:43 5:46 | 6:48 6:51 6:52 6:54 6:55 6:58 6:59 | 7:31 7:32 7:35 7:39 7:43 | 45:51 45:52 |
| 5-HT <sub>5A</sub> -5-CT        | D V C T                  | I -       | Y A S T A                | W F F - E - -                      | - - - L Y                | Q V - - -   |
| 5-HT <sub>1A</sub> -5-HT        | D V C T                  | I -       | - T S T A                | W F F - A - -                      | - - - N Y                | - I - - -   |
| 5-HT <sub>1B</sub> -Donitriptan | D I C T                  | I -       | - T S T A                | W F F I S M -                      | H L F T Y                | - V - T -   |
| 5-HT <sub>1D</sub> -5-HT        | D I C T                  | I -       | - T S T A                | W F F - S - -                      | - - - T Y                | - V - - -   |
| 5-HT <sub>1E</sub> -BRL54443    | D M C T                  | I -       | - T S T A                | W F F - E - -                      | - - - T Y                | - I - H -   |
| 5-HT <sub>1F</sub> -Lasmiditan  | W D I C T                | I P       | - T S T A                | W F F - E - N                      | - - - A Y                | - I K H D   |

24

25

26

27

28

29

30

31

32

**Fig. S4 Comparison of the binding pose of agonists and sequence alignment of residues in the binding pockets of G<sub>i/o</sub>-coupled 5-HT receptors.** **a** Comparison of the agonist-binding poses in G<sub>i/o</sub>-coupled 5-HT<sub>5A</sub> (light pink), 5-HT<sub>1A</sub> (cyan, PDB code: 7E2Y), 5-HT<sub>1B</sub> (purple, PDB code: 6G79), 5-HT<sub>1D</sub> (green, PDB code: 7E32), 5-HT<sub>1E</sub> (wheat, PDB code: 7E33), and 5-HT<sub>1F</sub> (coral, PDB code: 7EXD). **b** Sequence alignment of residues in the ligand-binding pocket of G<sub>i/o</sub>-coupled 5-HT receptors. The conserved residues are highlighted in solid dark green circles.

33 **Table S1. Cryo-EM data collection, model refinement, and validation statistics**

| 5-HT-5-HT <sub>5A</sub> -G <sub>i</sub><br>(PDB: 7X5H, EMD-33014) |             |
|-------------------------------------------------------------------|-------------|
| <b>Data collection and processing</b>                             |             |
| Magnification                                                     | 46,685      |
| Voltage (kV)                                                      | 300         |
| Electron exposure (e <sup>-</sup> /Å <sup>2</sup> )               | 70          |
| Defocus range (μm)                                                | -1.2 ~ -2.2 |
| Pixel size (Å)                                                    | 1.071       |
| Symmetry imposed                                                  | C1          |
| Initial particle projections (no.)                                | 3,767,450   |
| Final particle projections (no.)                                  | 754,854     |
| Map resolution (Å)                                                | 3.1         |
| FSC threshold                                                     | 0.143       |
| Map resolution range (Å)                                          | 2.5-5.0     |
| <b>Refinement</b>                                                 |             |
| Initial model used                                                | 7E2Y        |
| Model resolution (Å)                                              | 3.3         |
| FSC threshold                                                     | 0.5         |
| Map sharpening <i>B</i> factor (Å <sup>2</sup> )                  | 159.5       |
| Model composition                                                 |             |
| Non-hydrogen atoms                                                | 8768        |
| Protein residues                                                  | 1129        |
| Lipid                                                             | 0           |
| Water                                                             | 0           |
| <i>B</i> factors (Å <sup>2</sup> )                                |             |
| Protein                                                           | 151.3       |
| Ligand                                                            | 85.6        |
| R.m.s. deviations                                                 |             |
| Bond lengths (Å)                                                  | 0.003       |
| Bond angles (°)                                                   | 0.882       |
| Validation                                                        |             |
| MolProbity score                                                  | 1.21        |
| Clashscore                                                        | 4.27        |
| Rotamer outliers (%)                                              | 0.00        |
| Ramachandran plot                                                 |             |
| Favored (%)                                                       | 98.38       |
| Allowed (%)                                                       | 1.62        |
| Disallowed (%)                                                    | 0           |

35 **Table S2. Effects of alanine mutations of residues in the 5-HT<sub>5A</sub> pocket on the 5-CT-**  
 36 **induced G<sub>i</sub> recruitment.** The NanoBiT assay was used to evaluate the G<sub>i</sub>-coupling activity of  
 37 wild-type 5-HT<sub>5A</sub> and its mutants. Data shown are means ± S.E.M. of three independent  
 38 experiments, conducted in triplicate. All data were analyzed by ordinary one-way ANOVA with  
 39 Dunnett's test. \**P*<0.05, \*\**P*<0.01; \*\*\**P*<0.001, vs. WT receptor. U.D., undetectable.

40

| <b>Const.</b> | <b><i>pEC</i><sub>50</sub> ± S.E.M.</b> | <b>Fold over basal<br/>(Mean ± S.E.M.)</b> | <b>Cell surface<br/>expression(% WT)</b> |
|---------------|-----------------------------------------|--------------------------------------------|------------------------------------------|
| WT            | 7.331 ± 0.047                           | 2.218 ± 0.003                              | 100                                      |
| D121A         | U.D.                                    | 1.111 ± 0.012                              | 208.25                                   |
| V122A         | 4.952 ± 0.076***                        | 2.426 ± 0.067                              | 187.97                                   |
| C125A         | 5.643 ± 0.048***                        | 2.627 ± 0.026                              | 78.08                                    |
| V194A         | 6.524 ± 0.057***                        | 2.098 ± 0.021                              | 68.79                                    |
| S204A         | 6.097 ± 0.072*                          | 2.090 ± 0.013                              | 79.05                                    |
| T205A         | 5.790 ± 0.128***                        | 2.401 ± 0.044                              | 88.33                                    |
| W298A         | 7.013 ± 0.104                           | 1.167 ± 0.010                              | 131.16                                   |
| F301A         | 6.210 ± 0.104***                        | 2.066 ± 0.019                              | 145.33                                   |
| F302A         | 7.066 ± 0.075                           | 1.728 ± 0.041                              | 139.10                                   |
| E305A         | 7.838 ± 0.026**                         | 2.399 ± 0.008                              | 102.65                                   |
| L324A         | 7.009 ± 0.124                           | 1.537 ± 0.019                              | 79.39                                    |
| Y328A         | 4.614 ± 0.053***                        | 1.070 ± 0.009                              | 110.59                                   |

41

42 **Table S3. Effects of mutation of residue at 6.55 on the 5-CT-induced  $G_{i/o}$  recruitment.**  
 43  $pEC_{50}$  values were determined using a three-parameter logistic equation. Data shown are means  
 44  $\pm$  S.E.M. of three independent experiments, conducted in triplicate. Cell surface expression  
 45 values were normalized to the wild-type (WT), which was set to 100%. Ordinary one-way  
 46 ANOVA with Dunnett's test was used to determine the  $P$  values. \* $P$ <0.05; \*\* $P$ <0.01;  
 47 \*\*\* $P$ <0.001 vs. WT receptor. U.D., undetectable.

48

| Receptor           | Mutants | $pEC_{50} \pm$ S.E.M. | Fold over basal<br>(Mean $\pm$ S.E.M.) | Cell surface<br>expression<br>(%WT) |
|--------------------|---------|-----------------------|----------------------------------------|-------------------------------------|
| 5-HT <sub>5A</sub> | WT      | 7.331 $\pm$ 0.063     | 1.834 $\pm$ 0.003                      | 100                                 |
|                    | E305A   | 7.838 $\pm$ 0.026**   | 2.397 $\pm$ 0.013                      | 102.65                              |
|                    | E305S   | 7.686 $\pm$ 0.082*    | 1.812 $\pm$ 0.003                      | 114.30                              |
| 5-HT <sub>1A</sub> | WT      | 7.787 $\pm$ 0.082     | 2.190 $\pm$ 0.025                      | 100                                 |
|                    | A365E   | 7.093 $\pm$ 0.032***  | 2.551 $\pm$ 0.024                      | 148.36                              |
|                    | A365S   | 7.553 $\pm$ 0.033*    | 2.734 $\pm$ 0.003                      | 107.20                              |
| 5-HT <sub>1B</sub> | WT      | 8.160 $\pm$ 0.091     | 1.580 $\pm$ 0.006                      | 100                                 |
|                    | S334E   | 6.951 $\pm$ 0.177***  | 1.574 $\pm$ 0.036                      | 75.20                               |
|                    | S334A   | 8.054 $\pm$ 0.014     | 2.550 $\pm$ 0.008                      | 86.33                               |
| 5-HT <sub>1D</sub> | WT      | 7.859 $\pm$ 0.093     | 1.386 $\pm$ 0.012                      | 100                                 |
|                    | S321E   | 8.408 $\pm$ 0.032*    | 1.356 $\pm$ 0.005                      | 83.39                               |
|                    | S321A   | 7.823 $\pm$ 0.131     | 1.319 $\pm$ 0.004                      | 114.37                              |
| 5-HT <sub>1E</sub> | WT      | 5.660 $\pm$ 0.034     | 1.308 $\pm$ 0.031                      | 100                                 |
|                    | E311A   | 7.105 $\pm$ 0.180**   | 1.510 $\pm$ 0.026                      | 136.07                              |
|                    | E311S   | 6.400 $\pm$ 0.086**   | 1.243 $\pm$ 0.003                      | 102.91                              |
| 5-HT <sub>1F</sub> | WT      | 5.365 $\pm$ 0.056     | 1.863 $\pm$ 0.032                      | 100                                 |
|                    | E313A   | U.D.                  | 0.823 $\pm$ 0.024                      | 94.03                               |
|                    | E313S   | U.D.                  | 1.031 $\pm$ 0.023                      | 104.70                              |

49
